# Supplementary material
Source: Springer Nature journal article supplement (https://www.springermedizin.de/resource/supplementary/13045_2013_292_MOESM1_ESM.pdf/9661060)

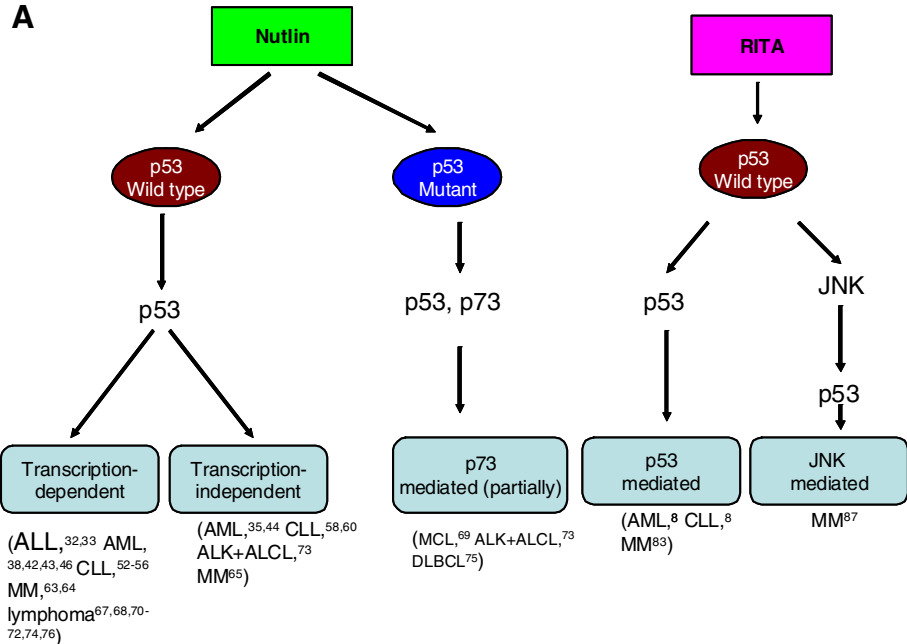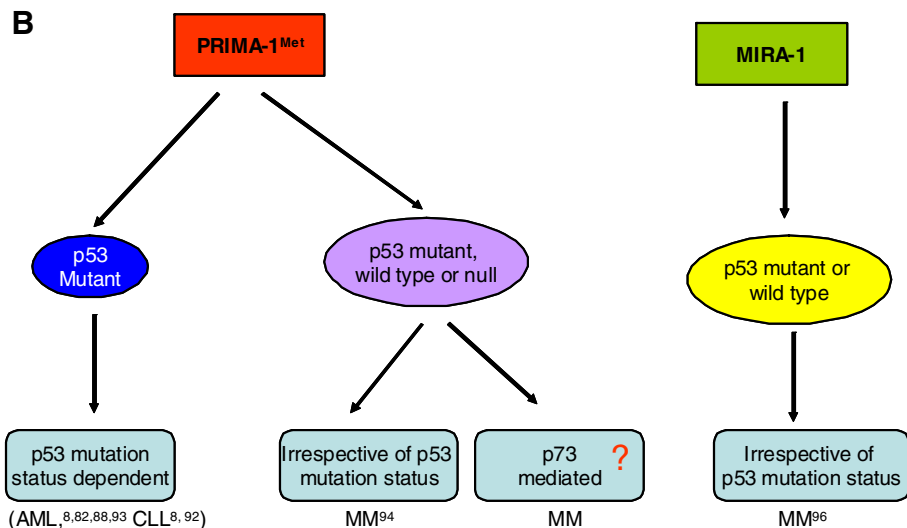

(Unpublished observation)

Supplement: MOESM1 [file 9661060]
